# Supplementary material
Source: PubMed Central journal article supplement (PMC6128766)
Supplement: NIHMS981072-supplement-3.pdf [file NIHMS981072-supplement-3.pdf]

# nature research

## Publishing Policy Worksheet for Authors

CORRESPONDING AUTHOR: Dr. Alexander Sobolevsky

MS NUMBER: NSMB-A40033A

MS TYPE: Article

### Instructions:

- Review each point
- Initial for completion
- If required, ensure that there is an appropriate statement in the body of your paper
- Upload the completed and signed worksheet along with other required documents as separate files with your final submission. Please note that certain forms may require a physical signature. Submitting a digitally signed form may delay acceptance.

Please note that failure to provide the requested documents and information will delay acceptance and publication of your paper. For additional guidance, please contact our editorial assistant at (EA; add email address)

| PERMISSION TO PUBLISH                                                                                                                                                                                                                                                                                                                                                                                                                                                                                                                                                                                                                                                                                                                                                                                                                                                                                                                                                                                                                                                                                                                  | Author Confirmation             |
|----------------------------------------------------------------------------------------------------------------------------------------------------------------------------------------------------------------------------------------------------------------------------------------------------------------------------------------------------------------------------------------------------------------------------------------------------------------------------------------------------------------------------------------------------------------------------------------------------------------------------------------------------------------------------------------------------------------------------------------------------------------------------------------------------------------------------------------------------------------------------------------------------------------------------------------------------------------------------------------------------------------------------------------------------------------------------------------------------------------------------------------|---------------------------------|
| <p><b>Before we can move ahead with acceptance and publication of your paper we must receive formal written permission use, edit, publish and distribute your work.</b></p> <p>Please note that you will retain copyright your paper, but that you are granting Nature Research certain rights and permissions for the full term of copyright and any extension thereto, as outlined in the License to Publish form.</p> <p><b>Please complete, sign, and return the form linked below.</b> Our legal department demands that we no longer accept “e-signatures” on any legal document, so please return the form with a handwritten signature, or an embedded image of a handwritten signature. <b>All legal forms must be signed by the corresponding author.</b></p> <p><b>All contributing authors must be listed on the License to Publish. If you cannot fit the names in the provided field, please instead write “see attached page” and include a second page with the full author list.</b></p> <p><a href="http://www.nature.com/licenceforms/nai/nai-ltp.docx">http://www.nature.com/licenceforms/nai/nai-ltp.docx</a></p> | <p>Author Initial <u>AS</u></p> |
| COLOR CHARGE AGREEMENT                                                                                                                                                                                                                                                                                                                                                                                                                                                                                                                                                                                                                                                                                                                                                                                                                                                                                                                                                                                                                                                                                                                 | Author Confirmation             |
| <p>We are committed to providing authors with the highest quality figures. In order to cover part of the additional cost of four-color reproduction, we charge authors a fee of \$620 for the first color figure and \$310 for each additional color figure. There are no additional submission fees or page charges.</p> <p><b>Please complete and sign the form linked here and return the form linked below:</b></p> <p><a href="http://www.nature.com/research/colour-form/rj-colour-figure-forms-2016.pdf">http://www.nature.com/research/colour-form/rj-colour-figure-forms-2016.pdf</a></p>                                                                                                                                                                                                                                                                                                                                                                                                                                                                                                                                     | <p>Author Initial <u>AS</u></p> |

| COMPETING INTEREST STATEMENTS (CI)                                                                                                                                                                                                                                                                                                                                                                                                                                                                                                                                                                                                                                                                                                                                                                                                                                                                                                                                                                                                    | Author Confirmation                                                                                                                                  |
|---------------------------------------------------------------------------------------------------------------------------------------------------------------------------------------------------------------------------------------------------------------------------------------------------------------------------------------------------------------------------------------------------------------------------------------------------------------------------------------------------------------------------------------------------------------------------------------------------------------------------------------------------------------------------------------------------------------------------------------------------------------------------------------------------------------------------------------------------------------------------------------------------------------------------------------------------------------------------------------------------------------------------------------|------------------------------------------------------------------------------------------------------------------------------------------------------|
| <p>Nature Research defines <b>Competing Interest (CI)</b> as financial and non-financial interests (including but not limited to funding, employment, stocks, shares, patents, personal or professional relationships with individuals or institutions, unpaid membership advocacy) that could or could be perceived to directly undermine the objectivity, integrity and value of a publication, or could be seen as having an influence on the judgments and actions of authors with regard to objective data presentation, analysis and interpretation.</p> <p><b>Please thoroughly review our <a href="#">policy</a> on Competing Interests and include a detailed statement in your final manuscript file, <i>and</i> in our manuscript tracking system.</b> Please ensure the statements are identical in both. Be specific about how each point stated relates to the research, list applicable author initials, and/or patent numbers.</p> <p>If there are no competing interests, a negative statement must be included.</p> | <p>Author Initial <u>AS</u></p>                                                                                                                      |
| LIFE SCIENCES REPORTING SUMMARY                                                                                                                                                                                                                                                                                                                                                                                                                                                                                                                                                                                                                                                                                                                                                                                                                                                                                                                                                                                                       | Author Confirmation                                                                                                                                  |
| <p>Please ensure that you have completed the Life Sciences Reporting Summary as completely and in as much detail as possible. <b>Please return an updated version of the summary with your final.</b></p> <p>More information on Nature Research's initiative to improve our transparency standards and increase reproducibility of published results, can be found <a href="#">here</a>.</p>                                                                                                                                                                                                                                                                                                                                                                                                                                                                                                                                                                                                                                         | <p>Author Initial <u>AS</u></p>                                                                                                                      |
| AUTHOR LIST CONFIRMATION                                                                                                                                                                                                                                                                                                                                                                                                                                                                                                                                                                                                                                                                                                                                                                                                                                                                                                                                                                                                              | Author Confirmation                                                                                                                                  |
| <p>Please review your complete author list to verify that it is complete and accurate and initial below. We ask that you consult with your coauthors to ensure that all names, affiliations, and titles are represented correctly. Please note that if any authors are added or removed after this point then all authors will be requested to provide approval documentation that could potentially delay the production of your paper.</p> <p>Author list: <b>Appu K. Singh, Luke L. McGoldrick, and Alexander I. Sobolevsky</b></p>                                                                                                                                                                                                                                                                                                                                                                                                                                                                                                | <p>I hereby certify that I have verified the author listed as presented in this paper.</p> <p>Author Initial <u>AS</u></p>                           |
| FUNDING SUPPORT CONFIRMATION                                                                                                                                                                                                                                                                                                                                                                                                                                                                                                                                                                                                                                                                                                                                                                                                                                                                                                                                                                                                          | Author Confirmation                                                                                                                                  |
| <p>If any listed authors received grants or funding then that information must be provided. <b>Please list each grant number, followed by the initials of the author who received it, in the Acknowledgements section of your paper.</b></p>                                                                                                                                                                                                                                                                                                                                                                                                                                                                                                                                                                                                                                                                                                                                                                                          | <p>I hereby certify that I have listed all applicable funding sources in accordance with NRG's funding mandates.</p> <p>Author Initial <u>AS</u></p> |
| THIRD-PARTY RIGHTS AND REUSE PERMISSIONS                                                                                                                                                                                                                                                                                                                                                                                                                                                                                                                                                                                                                                                                                                                                                                                                                                                                                                                                                                                              | Author Confirmation                                                                                                                                  |
| <p>It is your responsibility to obtain the right to use any items (figures, tables, images, videos or text boxes) that are reproduced (or adapted) from material for which you do not hold copyright and to give proper attribution to the creators of that work. This includes work that has previously been published elsewhere.</p>                                                                                                                                                                                                                                                                                                                                                                                                                                                                                                                                                                                                                                                                                                | <p>Author Initial <u>AS</u></p>                                                                                                                      |

If you do not hold the copyright for any such item (in whole or part) that is included in your paper, you must complete and return a [Third Party Rights Table](#).

For more information on what constitutes ownership by a third party, please contact our Editorial Assistant at [nsmb@us.nature.com](mailto:nsmb@us.nature.com)

| ITEMS TO BE INCLUDED WITH FINAL SUBMISSION                                                                                                                                                                                                                                                                                                                                                                                                                                                                                                                                                                                                                                                                                                                                                                                                               | Author; please initial for confirmation                                                                                             |
|----------------------------------------------------------------------------------------------------------------------------------------------------------------------------------------------------------------------------------------------------------------------------------------------------------------------------------------------------------------------------------------------------------------------------------------------------------------------------------------------------------------------------------------------------------------------------------------------------------------------------------------------------------------------------------------------------------------------------------------------------------------------------------------------------------------------------------------------------------|-------------------------------------------------------------------------------------------------------------------------------------|
| A point-by-point response to the remaining editorial and reviewer points                                                                                                                                                                                                                                                                                                                                                                                                                                                                                                                                                                                                                                                                                                                                                                                 | AU initial: <u>AS</u>                                                                                                               |
| License to Publish, <b>hand-signed</b> by the corresponding author                                                                                                                                                                                                                                                                                                                                                                                                                                                                                                                                                                                                                                                                                                                                                                                       | AU initial: <u>AS</u>                                                                                                               |
| Color Charge Form                                                                                                                                                                                                                                                                                                                                                                                                                                                                                                                                                                                                                                                                                                                                                                                                                                        | AU initial: <u>AS</u>                                                                                                               |
| Identical CI statement both manuscript and Manuscript Tracking System                                                                                                                                                                                                                                                                                                                                                                                                                                                                                                                                                                                                                                                                                                                                                                                    | AU initial: <u>AS</u>                                                                                                               |
| Final version of the Life Sciences Reporting Summary                                                                                                                                                                                                                                                                                                                                                                                                                                                                                                                                                                                                                                                                                                                                                                                                     | AU initial: <u>AS</u>                                                                                                               |
| Approval documentation for Author List changes                                                                                                                                                                                                                                                                                                                                                                                                                                                                                                                                                                                                                                                                                                                                                                                                           | AU initial: <u>AS</u>                                                                                                               |
| Funding and Support Confirmation                                                                                                                                                                                                                                                                                                                                                                                                                                                                                                                                                                                                                                                                                                                                                                                                                         | AU initial: <u>AS</u>                                                                                                               |
| Third-Party Rights table                                                                                                                                                                                                                                                                                                                                                                                                                                                                                                                                                                                                                                                                                                                                                                                                                                 | AU initial: <u>AS</u>                                                                                                               |
| FORMATTING REQUIREMENTS FOR FINAL SUBMISSION                                                                                                                                                                                                                                                                                                                                                                                                                                                                                                                                                                                                                                                                                                                                                                                                             | Author Confirmation                                                                                                                 |
| <p>Please use the supplied <b>Nature Research Formatting Guide</b> when preparing your final submission. Note that if files are not prepared in accordance with these guidelines, or in incorrect formats, this will cause delays in acceptance and publication.</p> <p>Please verify that you have provided the files in the formats listed here:</p> <ul style="list-style-type: none"> <li>• Main text and associated tables in <b>Microsoft Word</b></li> <li>• Figures must be submitted in a <b>layered format</b> with labels, text, lines/shapes and images individually selectable and on separate layers with all file-editing capabilities intact. Preferred formats include <b>AI, EPS, PS, PSD, TIFF</b>.</li> <li>• <b>Supplementary Information</b> prepared in strict accordance with the template and instructions provided.</li> </ul> | <p>I hereby certify that I have formatted my paper in accordance with the NRG Formatting Guide.</p> <p>Author Initial <u>AS</u></p> |

I hereby certify that I have reviewed and verified all points requested to the best of my ability and have included all required documentation with my final submission. SIGNED:  \_\_\_\_\_
